# Supplementary material for: Observations of the summertime atmospheric pollutants vertical distributions and the corresponding ozone production in Shanghai, China
Source: Copernicus journal article supplement (doi:10.5194/acp-2017-652), 2017-07-31
Supplement: Supplementary file 1 [file acp-2017-652-supplement.zip]

# Observations of the summertime atmospheric pollutants vertical distributions and the corresponding ozone production in Shanghai, China

Chengzhi Xing<sup>1#</sup>, Cheng Liu<sup>1,2,3,9##</sup>, Shanshan Wang<sup>4\*</sup>, Ka Lok Chan<sup>5\*</sup>, Yang Gao<sup>6</sup>, Xin Huang<sup>7</sup>, Wenjing Su<sup>1</sup>, ChengXin Zhang<sup>1</sup>, Yunsheng Dong<sup>3</sup>, Guangqiang Fan<sup>3</sup>, Tianshu Zhang<sup>3</sup>, Zhenyi Chen<sup>3</sup>, Qihou Hu<sup>3</sup>, Hang Su<sup>8,10</sup>, Zhouqing Xie<sup>1,2,3,9</sup>, Jianguo Liu<sup>2,3</sup>

<sup>1</sup>School of Earth and Space Sciences, University of Science and Technology of China, Hefei, 230026, China

<sup>2</sup>Center for Excellence in Regional Atmospheric Environment, Institute of Urban Environment, Chinese Academy of Sciences, Xiamen, 361021, China

<sup>3</sup>Key Lab of Environmental Optics & Technology, Anhui Institute of Optics and Fine Mechanics, Chinese Academy of Sciences, Hefei, 230031, China

<sup>4</sup>Shanghai Key Laboratory of Atmospheric Particle Pollution and Prevention (LAP<sup>3</sup>), Department of Environmental Science and Engineering, Fudan University, Shanghai, 200433, China

<sup>5</sup>Meteorological Institute, Ludwig-Maximilians Universität München, Munich, Germany

<sup>6</sup>College of Environmental Science and Engineering, Ocean University of China, Qingdao, 266100, China

<sup>7</sup>School of Atmospheric Sciences, Nanjing University, Nanjing, 210093, China

<sup>8</sup>Institute for Environmental and Climate Research, Jinan University, Guangzhou 511443, China

<sup>9</sup>Anhui Province Key Laboratory of Polar Environment and Global Change, USTC, Hefei, 230026, China

<sup>10</sup>Biogeochemistry Department, Max Planck Institute for Chemistry, Mainz, 55020, Germany

<sup>#</sup>This two authors contributed equally

\*Correspondence to: Shanshan Wang (shanshanwang@fudan.edu.cn), Ka Lok Chan (lok.chan@lmu.de), Cheng Liu (chliu81@ustc.edu.cn)

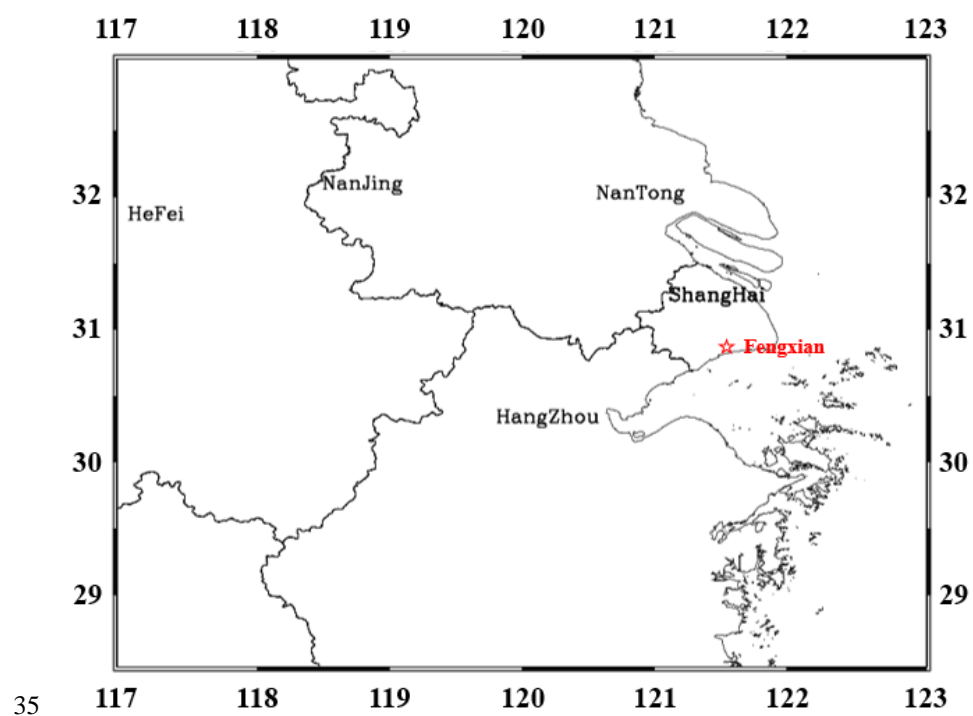

**Figure S1:** Location of the FengXian measurement site (red star) and neighbourhood.

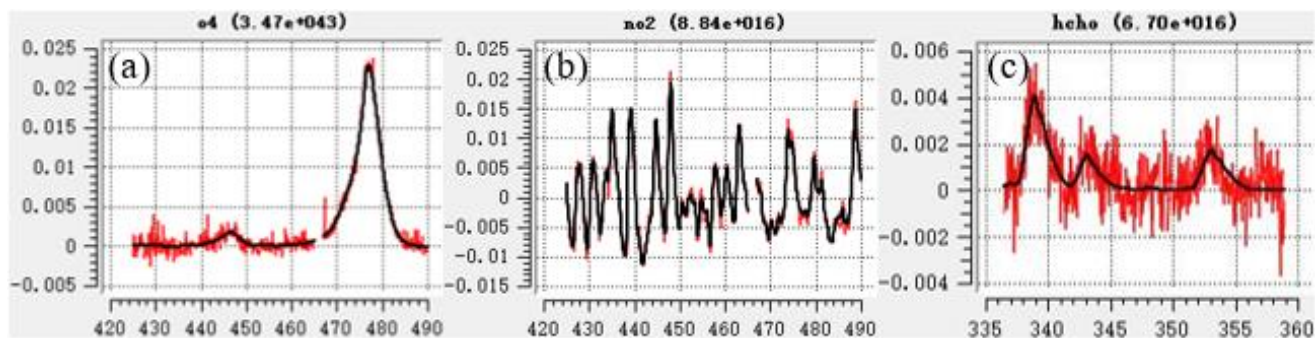

**Figure S2:** DOAS fit examples of (a) O<sub>4</sub> and (b) NO<sub>2</sub> at 08:24 LT on 17 May, as well as (c) HCHO at 08:24 LT on 18 May 2016. The fitted absorption structures (black curves) and the derived absorption structures from the measured spectra (red curves) are shown, respectively.

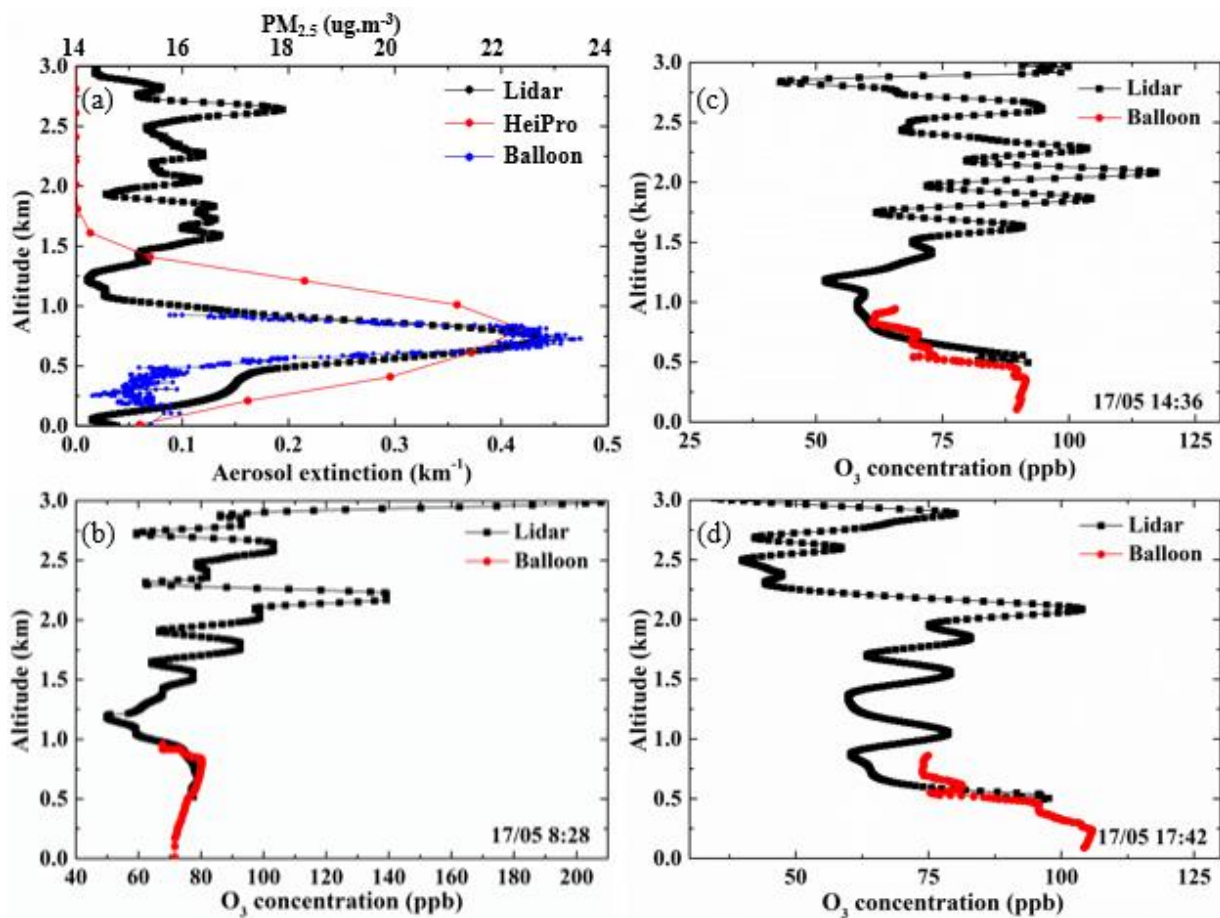

**Figure S3:** Inter-comparison of vertical distributions retrieved from MAX-DOAS measurement, lidar and balloon-borne observation on 17 May, 2016. (a) denotes balloon-based  $\text{PM}_{2.5}$  vertical profile measured during 08:10-08:40, lidar measured aerosol extinction profile at 08:25 and HeiPro retrieved aerosol extinction profile during 08:15-08:30. (b) to (d) shows balloon-based and lidar measured  $\text{O}_3$  profiles at three different periods, respectively.

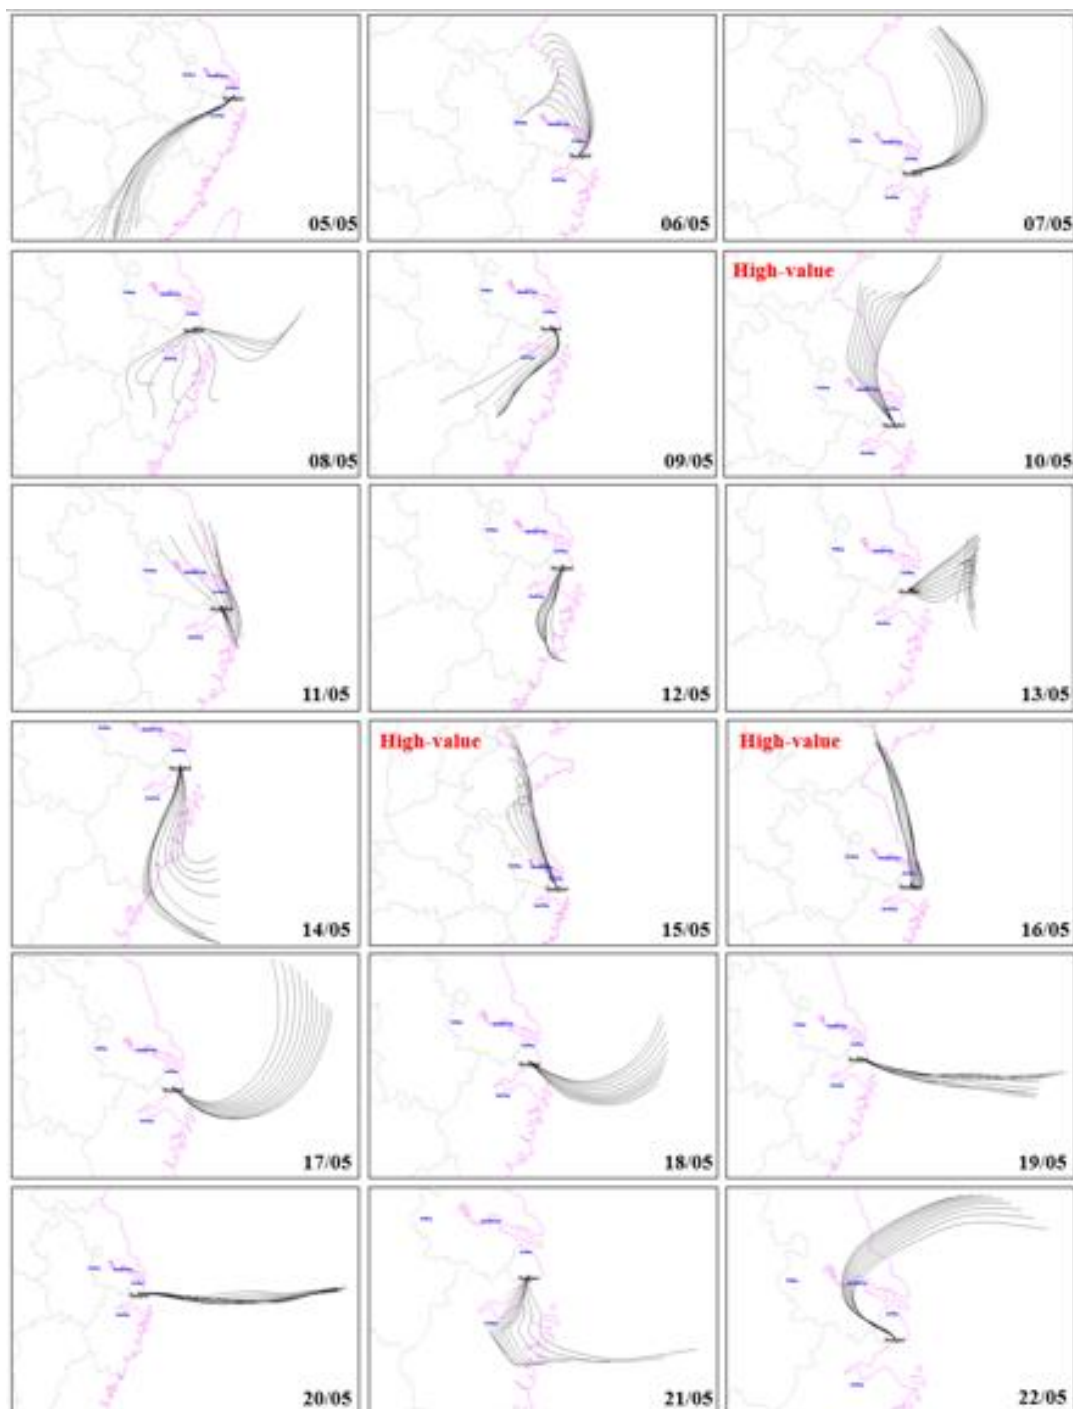

50 **Figure S4:** 24-h air mass back trajectories at 500 m computed from 8:00 to 17:00 LST (Local Standard Time) in Shanghai campaign site (30.8 °N, 121.5 °E).

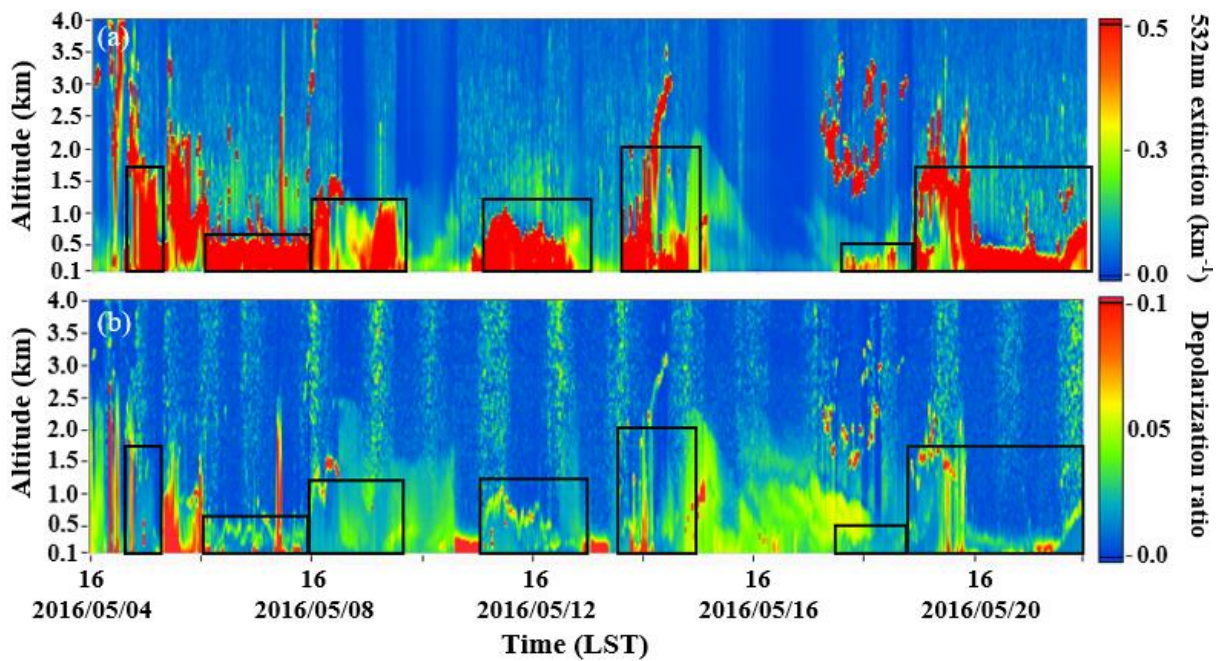

**Figure S5:** Time series of (a) aerosol extinction coefficient and (b) depolarization ratios.
